# Supplementary material for: Preparation and Characterization of Photocatalytically Active Antibacterial Surfaces Covered with Acrylic Matrix Embedded Nano-ZnO and Nano-ZnO/Ag
Source: MDPI journal article supplement (doi:10.3390/nano11123384), 2021-12-14
Supplement: s1 [file s1]

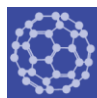

*Supplementary Materials*

# Preparation and Characterization of Photocatalytically Active Antibacterial Surfaces Covered with Acrylic Matrix Embedded Nano-ZnO and Nano-ZnO/Ag

Merilin Rosenberg <sup>1,2,3</sup>, Meeri Visnapuu <sup>4</sup>, Kristjan Saal <sup>4</sup>, Dmytro Danilian <sup>4</sup>, Rainer Pärna <sup>4</sup>, Angela Ivask <sup>1,\*</sup> and Vambola Kisand <sup>4,\*</sup>

<sup>1</sup> Institute of Molecular and Cell Biology, University of Tartu, Riia 23, 51010 Tartu, Estonia; merilin.rosenberg@ut.ee (M.R.)

<sup>2</sup> Laboratory of Environmental Toxicology, National Institute of Chemical Physics and Biophysics, Akadeemia tee 23, 12618 Tallinn, Estonia

<sup>3</sup> Department of Chemistry and Biotechnology, Tallinn University of Technology, Akadeemia tee 15, 12618 Tallinn, Estonia

<sup>4</sup> Institute of Physics, University of Tartu, W. Ostwaldi Str 1, 50411 Tartu, Estonia; meeri.visnapuu@ut.ee (M.V.); kristjan.saal@ut.ee (K.S.); dmytro.danilian@ut.ee (D.D.); rainer.parna@ut.ee (R.P.)

\* Correspondence: angela.ivask@ut.ee (A.I.); vambola.kisand@ut.ee (V.K.)

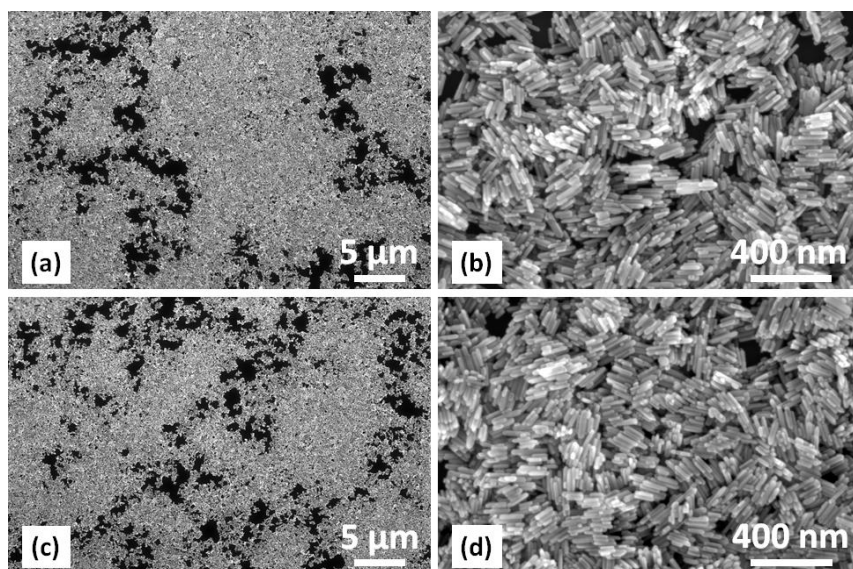

**Figure S1.** SEM images of nano-ZnO (a, b) and nano-ZnO/Ag (c, d) covered silicon surfaces. Images show a similar coverage of substrates by bare nanoparticles.

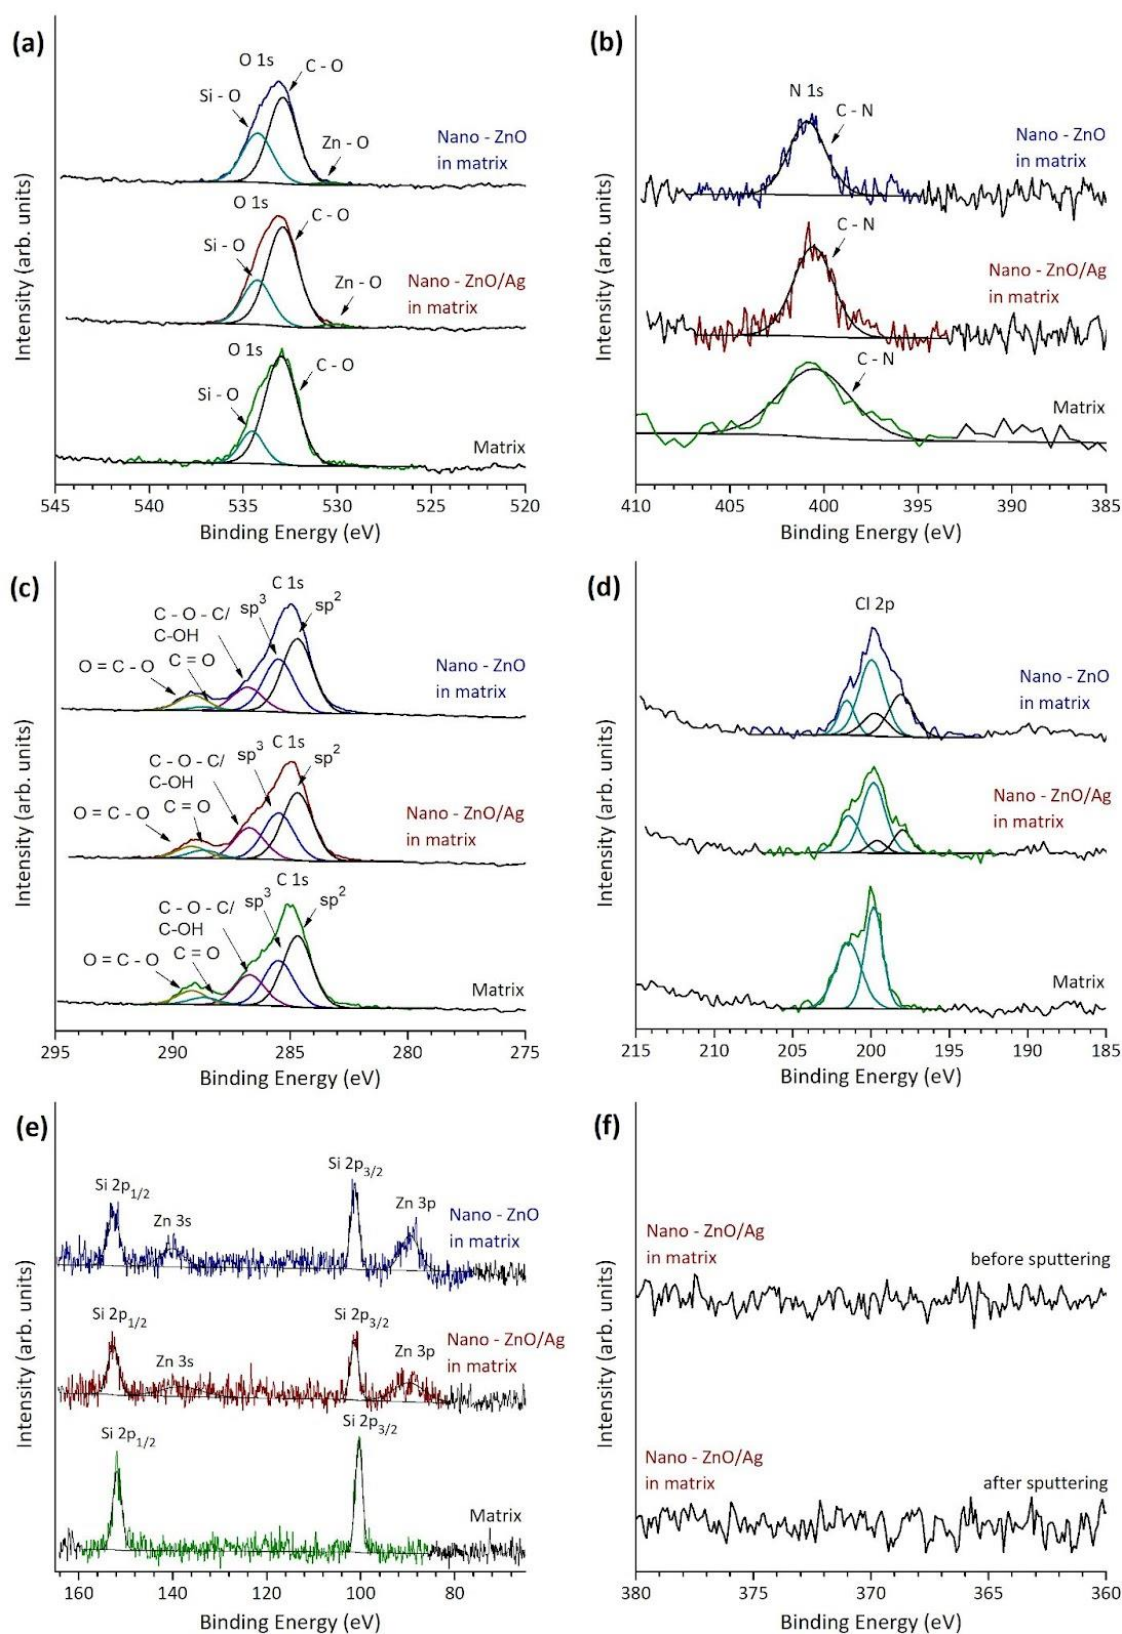

**Figure S2.** (a) The O 1s, (b) N 1s, (c) C 1s, (d) Cl 2p and (e) Si 2p XPS spectra ( $h\nu = 1486.6$  eV) of nano-ZnO, nano-ZnO/Ag containing coating and pure matrix material on wood substrate. (f) Spectral region respective to Ag 3d photoline of nano-ZnO/Ag containing coating on wood substrate before and after Ar<sup>+</sup> sputtering. No Ag signal was detected, since the amount of silver was below the detection limit of XPS.
